# Supplementary material for: Lithocholic acid controls adaptive immune responses by inhibition of Th1 activation through the Vitamin D receptor
Source: PubMed Central journal article supplement (PMC5426628; doi:10.1371/journal.pone.0176715), 2017-05-11
Supplement: pone.0176715.s001.pdf [file pone.0176715.s001.pdf]

# S1 Figure

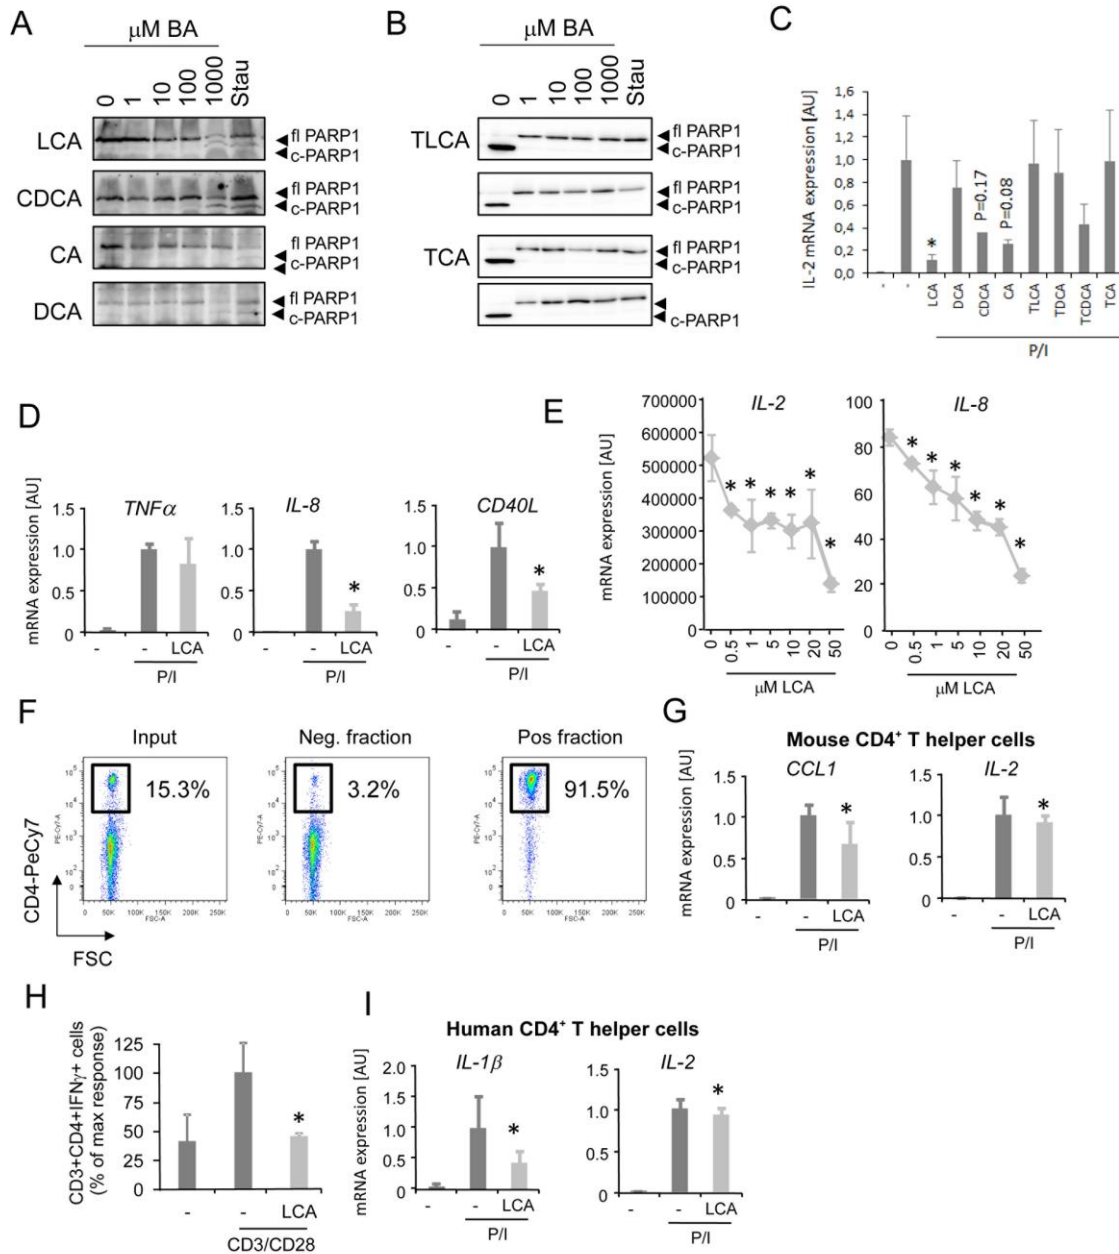

(A) Western blot images of cleaved PARP1 (c-PARP1) and full length PARP1 (fl PARP1) of Jurkat T cells treated for 24 hours with increasing concentrations of unconjugated bile acids and (B) taurine-conjugated bile acids. Stau; Staurosporine. (C) IL-2 mRNA expression of PMA/Ionomycin (P/I)-activated Jurkat T cells treated for 24 hours with 10  $\mu$ M of different bile acid species. (D) mRNA expression of *TNF $\alpha$* , *IL-8* and *CD40L* in Jurkat T cells activated with P/I and treated with 10  $\mu$ M LCA (light grey bars) or vehicle (dark grey bars). (E) *IL-2* and *IL-8* mRNA expression in P/I-activated Jurkat T cells in response to increasing concentrations of LCA. (F) Flowcytometry plots of primary mouse CD4<sup>+</sup> T helper cells demonstrating successful isolation of CD4<sup>+</sup> T helper cells. (G) mRNA expression of *CCL1* and *IL-2* in primary mouse CD4<sup>+</sup> T helper cells activated with P/I and treated with 10  $\mu$ M LCA (light grey bars) or vehicle (dark grey bars). (H) Intracellular IFN $\gamma$  staining of primary mouse T helper cells isolated from spleen (CD3<sup>+</sup>CD4<sup>+</sup>) activated with CD3/CD28 and treated with 10  $\mu$ M LCA (light grey bars) or vehicle (dark grey bars) analyzed by FACS. (I) mRNA expression of *IL-1 $\beta$*  and *IL-2* in primary human CD4<sup>+</sup> T helper cells activated with P/I and treated with 10  $\mu$ M LCA (light grey bars) or vehicle (dark grey bars). LCA, lithocholic acid; CDCA, chenodeoxycholic acid; CA, cholic acid; DCA, deoxycholic acid; TLCA, tauroolithocholic acid; TDCA, taurodeoxycholic acid; TCDCa, taurochenodeoxycholic acid; TCA, taurocholic acid; AU, Arbitrary units. P/I, PMA/ionomycin. Results represent the mean  $\pm$  SEM. \*Statistically significant, P<0.05. Experiments were performed in triplicates and repeated at least twice.
