# Supplementary material for: Lithocholic acid controls adaptive immune responses by inhibition of Th1 activation through the Vitamin D receptor
Source: PubMed Central journal article supplement (PMC5426628; doi:10.1371/journal.pone.0176715), 2017-05-11
Supplement: pone.0176715.s002.pdf [file pone.0176715.s002.pdf]

## S2 Figure

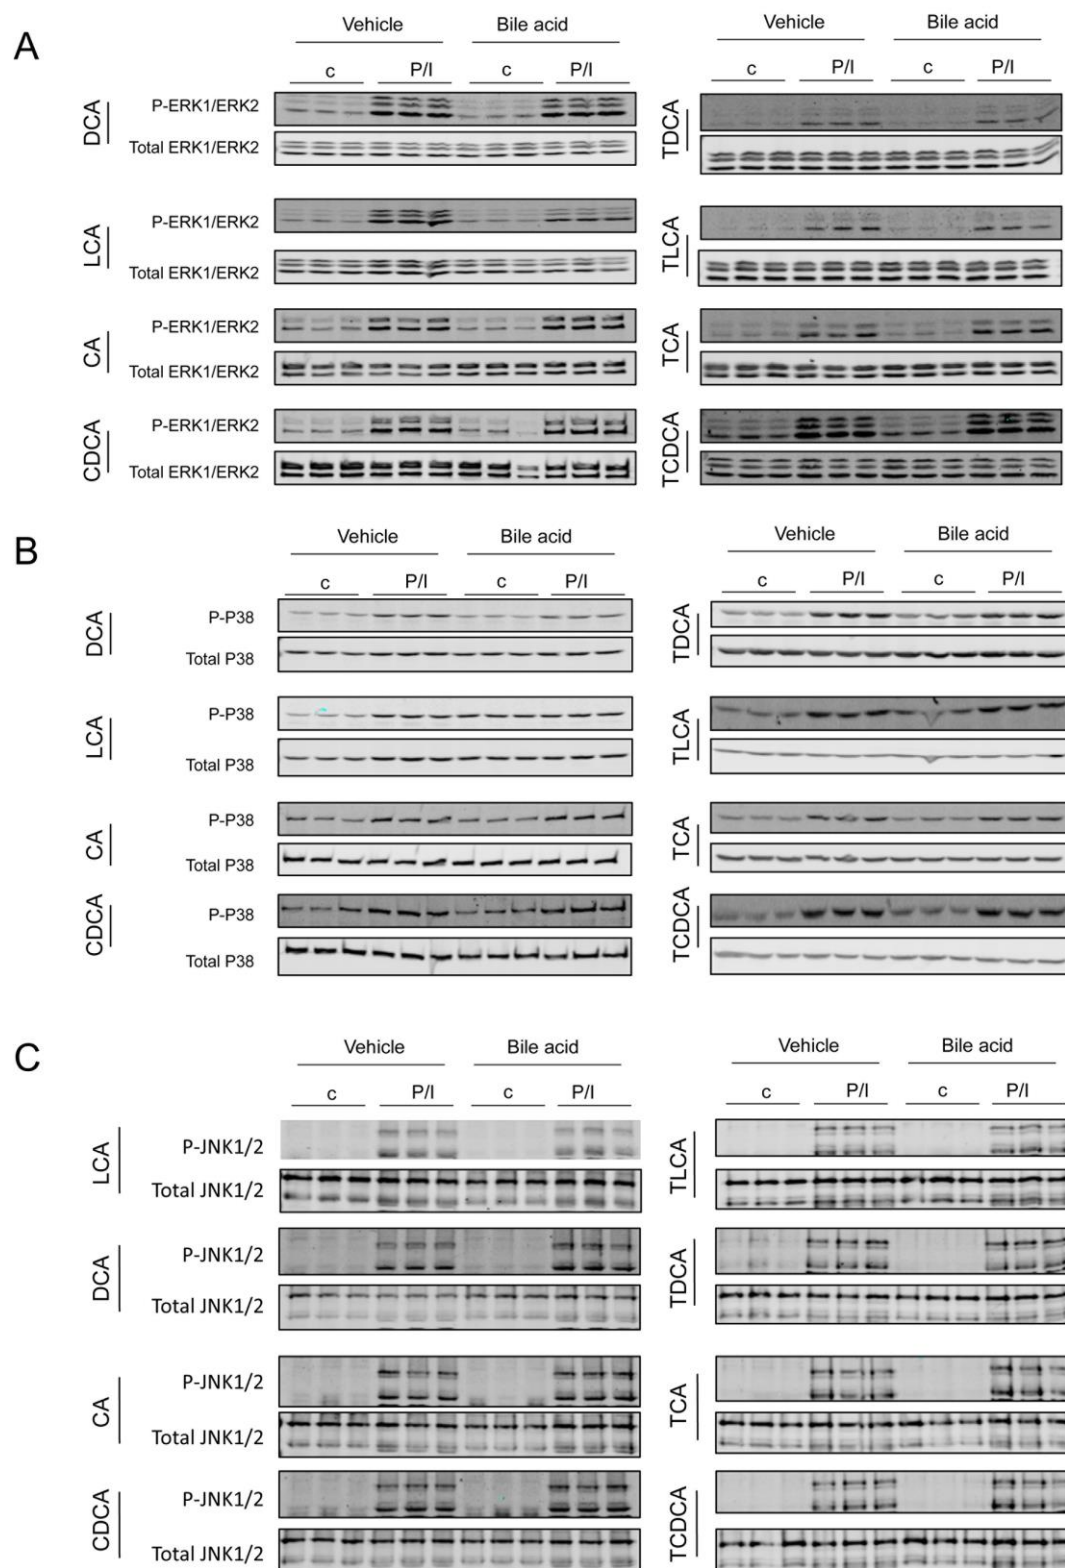

Western blot images of total and phosphorylated levels of **(A)** ERK1/2, **(B)** P38 and **(C)** JNK1/2 in response to 10  $\mu$ M bile acid treatment or vehicle in P/I-activated or resting Jurkat T cells. LCA, lithocholic acid; CDCA, chenodeoxycholic acid; CA, cholic acid; DCA, deoxycholic acid; TLCA, taurolithocholic acid; TDCA, taurodeoxycholic acid, TCDCA, taurochenodeoxycholic acid, TCA, taurocholic acid. P/I, PMA/ionomycin.
