# Supplementary material for: Lithocholic acid controls adaptive immune responses by inhibition of Th1 activation through the Vitamin D receptor
Source: PubMed Central journal article supplement (PMC5426628; doi:10.1371/journal.pone.0176715), 2017-05-11
Supplement: pone.0176715.s003.pdf [file pone.0176715.s003.pdf]

### S3 Figure

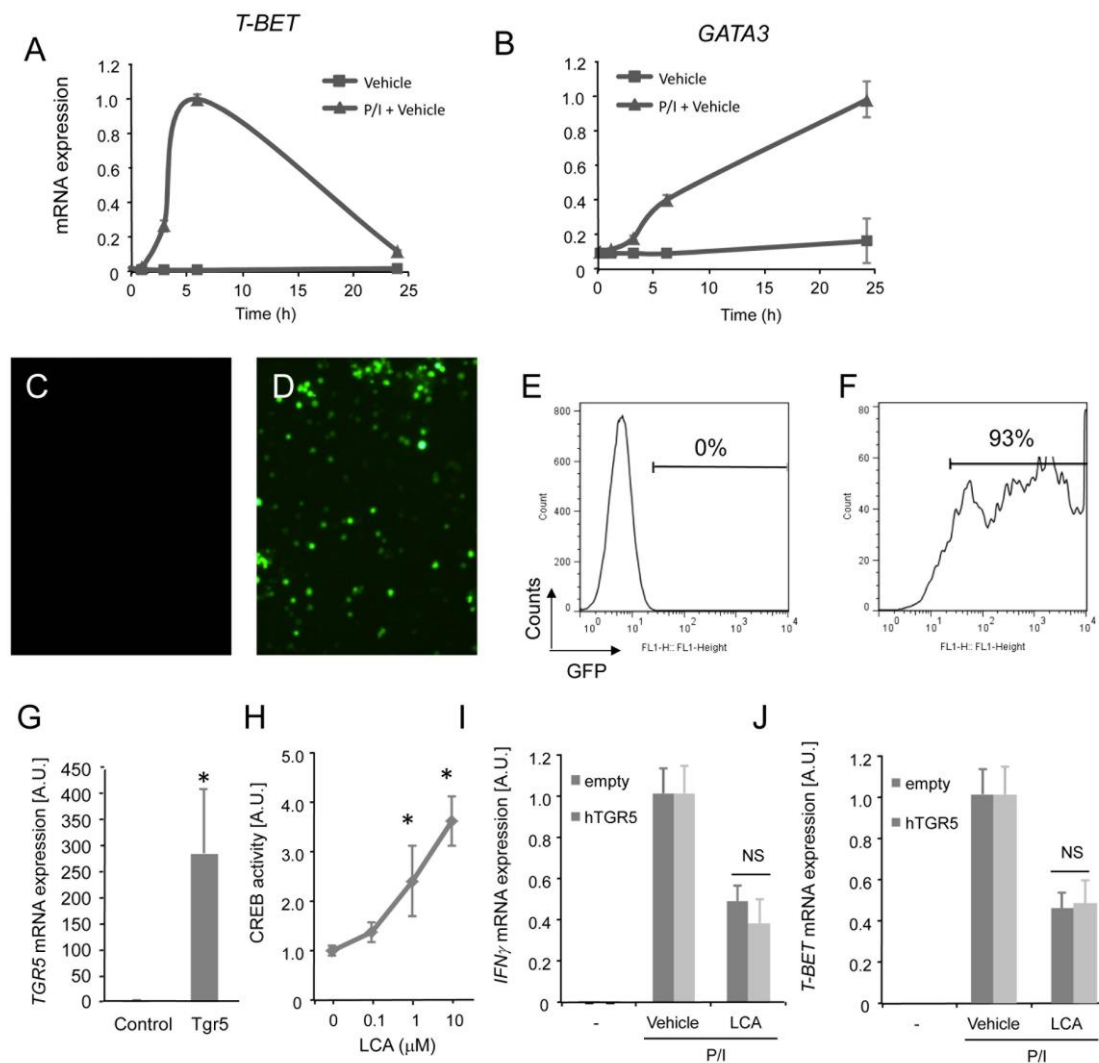

mRNA expression of (A) *T-BET* and (B) *GATA3* in response to P/I-activated Jurkat T cells (triangles) or in resting cells (squares). Results represent the mean  $\pm$  SEM. P/I, PMA/ionomycin. (C) Pictures of fluorescent microscopy of Jurkat T cells transfected with control plasmids and (D) GFP-plasmids. (E) Flowcytometry analysis of Jurkat T cells transfected with control plasmids and (F) GFP-plasmids. (G) mRNA expression of *TGR5* in Jurkat T cells transfected with control plasmid and *TGR5*-overexpressing plasmids. (H) CREB activity as measured by luciferase activity in Jurkat T cells transfected with a plasmid encoding *TGR5* and treated with increasing concentrations of LCA. (I) *IFN $\gamma$*  and (J) *T-BET* mRNA expression of Jurkat T cells transfected with plasmids encoding *TGR5* (hTGR5; light grey bars) or control plasmids (empty; dark grey bars) in response to P/I stimulation in combination with 10  $\mu$ M LCA treatment. LCA, lithocholic acid. P/I, PMA/ionomycin. Results represent the mean  $\pm$  SEM. NS, Not significant. \*Statistically significant,  $P < 0.05$ .
