# Supplementary material for: Lithocholic acid controls adaptive immune responses by inhibition of Th1 activation through the Vitamin D receptor
Source: PubMed Central journal article supplement (PMC5426628; doi:10.1371/journal.pone.0176715), 2017-05-11
Supplement: pone.0176715.s004.pdf [file pone.0176715.s004.pdf]

**Supporting Table 1: Primers for Real-time RT-PCR analysis**

|                       | Gene                                                    | Reference                     | Forward primer (5' to 3') | Reverse primer (5' to 3')   |                          |
|-----------------------|---------------------------------------------------------|-------------------------------|---------------------------|-----------------------------|--------------------------|
| Mouse                 | Cytokines,<br>chemokines,<br>costimulatory<br>molecules | <i>Cd40l</i>                  | NM_011616                 | CCTTGCTGAACTGTGAGGAGA       | CTTCGCTTACAACGTGTGCT     |
|                       |                                                         | <i>Tnf</i>                    | NM_013693                 | ACGGCATGGATCTCAAAGAC        | AGATAGCAAATCGGCTGACG     |
|                       |                                                         | <i>IFN<math>\gamma</math></i> | NM_008337                 | CCAAGCGGCTGACTGAACTC        | GCCTGTACTACCTGACACATTCG  |
|                       |                                                         | <i>IL-6</i>                   | NM_031168                 | GTTCTCTGGGAAATCGTGGA        | GGAAATTGGGGTAGGAAGGA     |
|                       |                                                         | <i>Ccl1</i>                   | NM_011329                 | GGCTGCCGTGTGGATACAG         | AGGTGATTTGAACCCACGTTT    |
|                       | <i>IL-2</i>                                             | NM_008366                     | TGAGCAGGATGGAGAATTACAGG   | GTCCAAGTTCATCTCTAGGCAC      |                          |
|                       | Housekeeping<br>genes                                   | <i>P0</i>                     | NM_007475                 | GGACCCGAGAAGACCTCCTT        | GCACATCACTCAGAATTTCAATGG |
| <i>B2m</i>            |                                                         | NM_009735                     | TTCTGGTGCTTGTCTCACTGA     | CAGTATGTTCCGGCTTCCCATTCC    |                          |
| Human                 | Cytokines,<br>chemokines,<br>costimulatory<br>molecules | <i>CD40LG</i>                 | NM_000074                 | GCTCCATTTATAGCCAGCCTC       | GTTTGGCGGAACGTGGGGT      |
|                       |                                                         | <i>TNF<math>\alpha</math></i> | NM_000594                 | AGGACACCATGAGCACTGAAAAG     | AGGAGAGGCTGAGGAACAAG     |
|                       |                                                         | <i>IFN<math>\gamma</math></i> | NM_000619                 | TCGGTAACTGACTTGAATGTCCA     | TCGCTTCCCTGTTTTAGCTGC    |
|                       |                                                         | <i>IL1<math>\beta</math></i>  | NM_000576                 | TGGCAGAAAAGGGAACAGAAAGG     | GTGAGTAGGAGAGGTGAGAGAGG  |
|                       |                                                         | <i>IL-2</i>                   | NM_000586                 | AACTCCTGTCTTGCAATTGCAC      | GCTCCAGTTGTAGCTGTGTTT    |
|                       |                                                         | <i>IL-6</i>                   | NM_000600                 | CGCCTTCGGTCCAGTTG           | TCGTTCTGAAGAGGTGAGTG     |
|                       | <i>IL-8</i>                                             | NM_000584                     | TGTTCCACTGTGCCTTGGTTTCTCC | TGCTTCCACATGTCCTCACAACATCAC |                          |
|                       | Th-associated<br>differentiation<br>genes               | <i>T-BET</i>                  | NM_013351                 | GTCCAACAATGTGACCCAGAT       | ACCTCAACGATATGCAGCCG     |
|                       |                                                         | <i>BCL6</i>                   | NM_001130845              | GGAGTCGAGACATCTTGACTGA      | ATGAGGACCGTTTTATGGGCT    |
|                       |                                                         | <i>FOXP3</i>                  | NM_014009                 | GTGGCCCGGATGTGAGAAG         | GGAGCCCTTGTCGGATGATG     |
|                       |                                                         | <i>GATA3</i>                  | NM_001002295              | GCCCCTCATTAAGCCCAAG         | TTGTGGTGGTCTGACAGTTCCG   |
|                       |                                                         | <i>MAF</i>                    | NM_005360                 | CTGGCAATGAGCAACTCCGA        | AGCCGGTCATCCAGTAGTAGT    |
|                       |                                                         | <i>RORA</i>                   | NM_134260                 | ACTCCTGTCTCGTCAGAAGA        | CATCCCTACGGCAAGGCATTT    |
|                       |                                                         | <i>RORC</i>                   | NM_005060                 | CTGGGCATGTCCGAGATG          | GAGGGTCTTGACCACTGG       |
|                       |                                                         | <i>SMAD2</i>                  | NM_005901                 | CGTCCATCTTGCCATTCACG        | CTCAAGCTCATCTAATCGTCCTG  |
|                       |                                                         | <i>SMAD3</i>                  | NM_001145102              | TGGACGCAGGTTCTCCAAC         | CCGGCTCGCAGTAGGTAAC      |
|                       |                                                         | <i>SMAD4</i>                  | NM_005359                 | CTCATGTGATCTATGCCCGTC       | AGGTGATACAACCTCGTTCGTAGT |
|                       |                                                         | <i>STAT1</i>                  | NM_007315                 | CGGCTGAATTTCCGCACCT         | CAGTAACGATGAGAGGACCCT    |
|                       |                                                         | <i>STAT3</i>                  | NM_139276                 | ACCAGCAGTATAGCCGCTTC        | GCCACAATCCGGGCAATCT      |
|                       |                                                         | <i>STAT4</i>                  | NM_001243835              | GCTTAACAGCCTCGATTCAAGA      | GAGCATGGTGTTCATTAACAGGT  |
|                       |                                                         | <i>STAT5</i>                  | NM_003152                 | CGACGGGACCTTCTTGTTG         | GTTCCGGGGAGTCAAACCTCC    |
|                       | <i>STAT6</i>                                            | NM_001178080                  | CGAGTAGGGGAGATCCACCTT     | GCAGGAGTTTCTATCAAGCTGTG     |                          |
|                       | BA receptor<br>genes                                    | <i>CHRM1</i>                  | NM_000738                 | CTCTATACCACGTACCTGTCA       | CCGAGTCACGGAGAAGTAGC     |
|                       |                                                         | <i>CHRM2</i>                  | NM_000739                 | AACTCCTCTAACAATAGCCTGGC     | GTTCCCGATAATGGTCACCAAA   |
|                       |                                                         | <i>CHRM3</i>                  | NM_000740                 | CACGTACCGAGCCAAACGAA        | AGGACAAAGGAGATGACCCAA    |
|                       |                                                         | <i>CHRM4</i>                  | NM_000741                 | AGGACACTTCCAATGAGTCCA       | TGTCTGCTTCGTCACAATCTG    |
|                       |                                                         | <i>CHRM5</i>                  | NM_012125                 | AGTCTGGCTTGTGACCTTTGG       | TGTCAAGGGTCTTGTGATGGA    |
|                       |                                                         | <i>FPR1</i>                   | NM_002029                 | TGGGAGGACATTGGCCTTTC        | GGATGCAGGACGCAAACAC      |
|                       |                                                         | <i>FPR2</i>                   | NM_001462                 | AGTCTGCTGGCTACACTGTTC       | TGGTAATGTGGCCGTGAAAGA    |
|                       |                                                         | <i>FPR3</i>                   | NM_002030                 | GCTAGTCCACGGAGTACCT         | GGTAGGATGGCACTGAAAGAGA   |
|                       |                                                         | <i>SIPR2</i>                  | NM_004230                 | CATCGTCATCCTCTGTTGCG        | GCCTGCCAGTAGATCGGAG      |
|                       |                                                         | <i>TGR5</i>                   | NM_001077191              | CCCAGGCTATCTTCCAGC          | GCCAGGACTGAGAGGAGCA      |
|                       |                                                         | <i>FXR</i>                    | NM_001206978              | GACTTTGGACCATGAAGACCAG      | GCCCAGACGGAAGTTTCTTATT   |
| <i>PXR</i>            |                                                         | NM_022002                     | TTGCCCATCGAGGACCAGAT      | GTCTCCGCGTTGAACACTGT        |                          |
| <i>VDR</i>            |                                                         | NM_001017536                  | TCTCCAATCTGGATCTGAGTGAA   | GGATGCTGTAACCTGACCAGGT      |                          |
| Housekeeping<br>genes | <i>P0</i>                                               | NM_001002                     | TCGACAATGGCAGCATCTAC      | ATCCGTCTCCACAGACAAGG        |                          |
|                       | <i>B2M</i>                                              | NM_004048                     | CTCGCGCTACTCTCTTTCT       | TGCTCCACTTTTTCAATTCTCT      |                          |
